# Supplementary material for: Loss‐of‐function mutation of rice SLAC7 decreases chloroplast stability and induces a photoprotection mechanism in rice
Source: PubMed Central journal article supplement — J Integr Plant Biol. 2015 May 6;57(12):1063–77. doi: 10.1111/jipb.12350 (PMC5029597; doi:10.1111/jipb.12350), 2015-05-06
Supplement: JIPB-57-1063-s001.pdf [file JIPB-57-1063-s001.pdf]

## Supplemental data

**Table S1. List of primers used in this study.**

| Purpose                                        | Primer              | Primer sequence (5'-3')                    |
|------------------------------------------------|---------------------|--------------------------------------------|
| Amplification of <i>SLAC7</i> artificial miRNA | SM7-1               | AGTCTAATAGGATATATGGCCTGCAGGAGATTCAGTTTGA   |
|                                                | SM7-2               | TGCAGGCCATATATCCTATTAGACTGCTGCTGCTACAGCC   |
|                                                | SM7-3               | CTCAGGCGATAAATCCTATTAGATTCCTGCTGCTAGGCTG   |
|                                                | SM7-4               | AATCTAATAGGATTTATCGCCTGAGAGAGGGCAAAAAGTGAA |
| Identification of <i>slac7</i>                 | NTLB5               | AATCCAGATCCCCCGAATTA                       |
|                                                | FHU78F              | TTATTGTTGCTTCCCTTGCC                       |
|                                                | FHU78R              | ATCACTCACCACCCTTCAGG                       |
| Amplification of <i>SLAC7</i> promoter         | SP7F                | TTGTGCGACTGTCGTCAAGGCGGAGGG                |
|                                                | SP7R                | GCTCTAGATCGTCGCATGTGACTATCC                |
| <i>SLAC7</i> overexpression constructs         | SO7F                | TTGGTACCGCAGTGAAAGAAGCATCC                 |
|                                                | SO7R                | TTGGATCCACATGTTGTACTGAGCGTGT               |
| Subcellular location constructs                | SB7F                | TTGAATTTCGCAGTGAAAGAAGCATCC                |
|                                                | SB7R                | TTTCTAGAACATGTTGTACTGAGCGTGT               |
|                                                | <i>SLAC7</i> -F     | GGGCAAGGGAAGCAACAATA                       |
|                                                | <i>SLAC7</i> -R     | GGCTGCGACCGGAACAC                          |
|                                                | <i>ubiquitin</i> -F | AACCAGCTGAGGCCCAAGA                        |
|                                                | <i>ubiquitin</i> -R | AACCAGCTGAGGCCGCCGA                        |
|                                                | <i>AR320</i> -F     | GATTCCTCGTTTCGGGAGAT                       |
|                                                | <i>AR320</i> -R     | TTTCGGGATGCTCAAATCG                        |
|                                                | <i>AR350</i> -F     | ATCAAGGGCGAGGAAAGAATC                      |
|                                                | <i>AR350</i> -R     | CATCCACTGCAAAGCGGCT                        |
|                                                | <i>AR440</i> -F     | GGACAGCGGAAGTTTTAACCAT                     |
|                                                | <i>AR440</i> -R     | ATTTGCGGAAGTATTGACG                        |
|                                                | <i>AR500</i> -F     | CATTAGTCCCGGTACGAGGT                       |
|                                                | <i>AR500</i> -R     | CAAGTGAGCATGGACCAATC                       |
|                                                | <i>IP240</i> -F     | GATCGCGTTTGATTAGAGTGA                      |
|                                                | <i>IP240</i> -R     | CCACTTATAGTGACTGGATGA                      |
|                                                | <i>IP350</i> -F     | GGTCCGCAACGAGAAGA                          |
|                                                | <i>IP350</i> -R     | CGCAATGGCGTTCGAAAG                         |
|                                                | <i>IP570</i> -F     | GGTAACTGGTTGACTCCT                         |
|                                                | <i>IP570</i> -R     | CGCGCAATTCATCAATCT                         |
|                                                | <i>IP760</i> -F     | GCATGAGTGGGAGCAACACA                       |
|                                                | <i>IP760</i> -R     | CTAGCCTTCTGTTTCAAACGT                      |
|                                                | <i>IP840</i> -F     | GCCGCCAATTTTCCAGTGT                        |
|                                                | <i>IP840</i> -R     | GCCGCCAATTTTCCAGTGT                        |
|                                                | <i>CK040</i> -F     | GTTTTCTACCTGGTGGCATTCC                     |
|                                                | <i>CK040</i> -R     | GTTTTCTACCTGGTGGCATTCC                     |
|                                                | <i>CK110</i> -F     | TGGCCGGGATAGCCTACAA                        |
|                                                | <i>CK110</i> -R     | TGCCGCTTCTGCCACTCT                         |

## RT-qPCR

|                |                          |
|----------------|--------------------------|
| <i>CK230-F</i> | CCTTCACCAAAGACCAGGAGTT   |
| <i>CK230-R</i> | CACGATGAAACCTTCCACATAGTC |
| <i>CK810-F</i> | CACCGGCCAGGGAATCTT       |
| <i>CK810-R</i> | GCCATCATCTTGTTCGTCGAT    |
| <i>CK860-F</i> | CACGCACACGAGCTGCTAAT     |
| <i>CK860-R</i> | CCGGGTCCCACCTGTCA        |
| <i>PORA-F</i>  | TGTA CTGGAGCTGGAACAACAA  |
| <i>PORA-R</i>  | GAGCACAGCAAATCCTAGACG    |
| <i>YGL1-F</i>  | CCTTTTCAGTTCAGGCAAGC     |
| <i>YGL1-R</i>  | CCTTTTCAGTTCAGGCAAGC     |
| <i>NYC1-F</i>  | GCCATGAATGTCATGCAACACC   |
| <i>NYC1-R</i>  | ATCCTCGGAACCAATGTCCTTGC  |
| <i>NYC3-F</i>  | TGCTGCATCCTGTCCACACCTTG  |
| <i>NYC3-R</i>  | TGCTGCATCCTGTCCACACCTTG  |
| <i>PAO-F</i>   | TCCGATGTTACCGAAGGAGT     |
| <i>PAO-R</i>   | CTGGAAAAGTTCCGAGCAC      |
| <i>SGR-F</i>   | CGGTGTCGCACACCATCAACC    |
| <i>SGR-R</i>   | GGAGTGGAAGTAGACCCACAC    |
| <i>RCCR-F</i>  | TGGTGCTTCTGGACCTTCTC     |
| <i>RCCR-R</i>  | CGGCAAATTTGAAGTCAGGT     |
| <i>NOL-F</i>   | GCCAGCACAAGAGGATGATTG    |
| <i>NOL-R</i>   | GGTAACTCCTTGTGGCTGCAT    |
| <i>RBCS-F</i>  | TCCGCTGAGTTTTGGCTATTT    |
| <i>RBCS-R</i>  | GGACTTGAGCCCTGGAAGG      |
| <i>RBCL-F</i>  | CTTGGCAGCATTCCGAGTAA     |
| <i>RBCL-R</i>  | ACAACGGGCTCGATGTGATA     |
| <i>CAB1-F</i>  | AGATGGGTTTAGTGCGACGAG    |
| <i>CAB1-R</i>  | AGATGGGTTTAGTGCGACGAG    |
| <i>CAB2-F</i>  | TGTTCTCCATGTTCCGGCTTCT   |
| <i>CAB2-R</i>  | GCTACGGTCCCCACTTCACT     |
| <i>HEMA1-F</i> | CGCTATTTCTGATGCTATGGGT   |
| <i>HEMA1-R</i> | TCTTGGGTGATGATTGTTTGG    |
| <i>OsDOS-F</i> | ATGATGATGATGGGGGAAGG     |
| <i>OsDOS-R</i> | CTCACGGGGAGGTGAGACC      |
| <i>Osh69-F</i> | GGCCTTGTGAACCCTGACA      |
| <i>Osh69-R</i> | GGCCTTGTGAACCCTGACA      |

---

**Table S2. Up-regulated genes in *slac7* leaves.**

| <b>ProbeSet ID</b>    | <b>OsGI</b>    | <b>Fold</b> |
|-----------------------|----------------|-------------|
| Os.7991.1.S1_at       | LOC_Os04g41620 | 57.3793     |
| OsAffx.3920.1.S1_s_at | LOC_Os04g27670 | 35.1909     |
| Os.13965.1.S1_at      | LOC_Os01g28500 | 23.1269     |
| Os.53239.1.S1_at      | LOC_Os12g30550 | 20.7827     |
| OsAffx.3920.1.S1_at   | LOC_Os04g27670 | 20.1257     |
| Os.51063.1.S1_at      | LOC_Os09g28210 | 19.7996     |
| Os.38856.1.A1_s_at    | LOC_Os01g67950 | 17.4152     |
| OsAffx.32170.1.S1_at  | LOC_Os12g43450 | 14.8086     |
| Os.1385.1.S1_at       | LOC_Os01g71670 | 14.4199     |
| Os.12201.1.S1_at      | LOC_Os09g27750 | 12.3757     |
| Os.2677.1.S1_at       | LOC_Os07g48830 | 12.1314     |
| Os.28200.1.S1_x_at    | LOC_Os03g61160 | 11.7676     |
| Os.22312.3.A1_a_at    | LOC_Os05g28740 | 11.7144     |
| Os.20206.1.S1_at      | LOC_Os02g41840 | 9.6125      |
| Os.27232.1.S1_at      | LOC_Os01g68650 | 9.5219      |
| Os.27793.1.S1_at      | LOC_Os02g14430 | 9.0977      |
| Os.49536.1.S1_at      | LOC_Os08g09950 | 7.9776      |
| Os.10166.1.S1_at      | LOC_Os04g41680 | 7.4858      |
| Os.12633.1.S1_at      | LOC_Os11g26790 | 7.397       |
| Os.12633.1.S1_s_at    | LOC_Os11g26790 | 7.3705      |
| Os.27638.1.S1_at      | LOC_Os05g48200 | 6.933       |
| Os.6786.1.S1_a_at     | LOC_Os10g40720 | 6.807       |
| Os.11897.1.S1_at      | LOC_Os03g61150 | 6.7942      |
| Os.11323.1.S1_at      | LOC_Os03g20120 | 6.7567      |
| Os.1385.2.S1_x_at     | LOC_Os01g71670 | 6.7122      |
| Os.27793.1.S1_x_at    | LOC_Os02g14430 | 6.6596      |
| Os.12241.1.S1_at      | LOC_Os03g14050 | 6.5453      |
| Os.26687.1.S1_at      | LOC_Os04g40990 | 6.3434      |
| Os.50846.1.S1_s_at    | LOC_Os01g10490 | 6.2441      |
| Os.42285.1.S1_x_at    | LOC_Os01g58550 | 6.1799      |
| Os.46941.1.S1_s_at    | LOC_Os06g48500 | 5.6994      |
| Os.49023.1.S1_x_at    | LOC_Os03g22680 | 5.5996      |
| Os.12415.1.S1_at      | LOC_Os09g02180 | 5.5436      |
| Os.12551.1.S1_s_at    | LOC_Os05g46480 | 5.5001      |
| Os.37834.1.S1_a_at    | LOC_Os04g58280 | 5.4875      |
| Os.8098.1.S1_at       | LOC_Os11g18570 | 5.4413      |
| Os.5147.1.S1_at       | LOC_Os03g49440 | 5.2053      |
| Os.8850.1.S1_x_at     | LOC_Os09g04160 | 5.1817      |
| Os.51595.1.S1_at      | LOC_Os01g46370 | 5.1141      |
| Os.37822.2.S1_at      | LOC_Os01g12020 | 5.1089      |
| Os.11179.1.S1_at      | LOC_Os03g16780 | 5.0423      |
| Os.50825.1.S1_s_at    | LOC_Os05g39990 | 5.0421      |

|                    |                |        |
|--------------------|----------------|--------|
| Os.11546.1.S1_at   | LOC_Os06g35520 | 5.0232 |
| Os.32022.1.S1_x_at | LOC_Os07g37620 | 5.0211 |
| Os.4644.1.S1_at    | LOC_Os01g60770 | 4.9483 |
| Os.4683.2.S1_at    | LOC_Os01g42520 | 4.8672 |
| Os.25734.2.S1_a_at | LOC_Os04g34170 | 4.85   |
| Os.43596.1.S1_at   | LOC_Os01g10110 | 4.8407 |
| Os.10933.1.S1_at   | LOC_Os01g50910 | 4.8172 |
| Os.10379.1.S1_at   | LOC_Os02g49860 | 4.8136 |
| Os.10497.1.S1_s_at | LOC_Os07g23640 | 4.8132 |
| Os.6042.1.S1_at    | LOC_Os07g25810 | 4.7688 |
| Os.9086.1.S1_at    | LOC_Os03g10210 | 4.6762 |
| Os.51718.1.S1_at   | LOC_Os11g26780 | 4.6389 |
| Os.17405.1.S1_a_at | LOC_Os12g31860 | 4.5591 |
| Os.27244.1.A1_s_at | LOC_Os04g32850 | 4.5191 |
| Os.11169.1.S1_a_at | LOC_Os06g49190 | 4.5122 |
| Os.27795.1.S1_at   | LOC_Os11g06980 | 4.4895 |
| Os.39066.1.S1_at   | LOC_Os05g31140 | 4.431  |
| Os.11795.1.S1_s_at | LOC_Os03g63950 | 4.3221 |
| Os.18633.1.S1_at   | LOC_Os04g43710 | 4.3207 |
| Os.38638.1.S1_at   | LOC_Os06g04990 | 4.2548 |
| Os.23219.1.S1_at   | LOC_Os01g52690 | 4.2362 |
| Os.7771.1.S1_at    | LOC_Os06g43600 | 4.2352 |
| Os.12234.1.S1_s_at | LOC_Os10g40730 | 4.1476 |
| Os.11795.1.S1_a_at | LOC_Os03g63950 | 4.1143 |
| Os.8385.2.S1_at    | LOC_Os10g06000 | 4.1034 |
| Os.6363.1.S1_at    | LOC_Os10g38080 | 4.0862 |
| Os.28139.1.S1_at   | LOC_Os01g62260 | 4.0736 |
| Os.11513.1.S1_at   | LOC_Os12g38140 | 4.058  |
| Os.11287.1.S1_at   | LOC_Os06g50930 | 4.0115 |
| Os.14366.1.S1_at   | LOC_Os08g37830 | 4.0069 |
| Os.10006.1.S1_at   | LOC_Os01g47400 | 4.002  |
| Os.2404.1.S1_at    | LOC_Os10g40700 | 3.9615 |
| Os.55380.1.S1_at   | LOC_Os06g46740 | 3.9597 |
| Os.49245.1.S1_at   | LOC_Os02g43330 | 3.9513 |
| Os.4980.1.S1_at    | LOC_Os03g59300 | 3.9441 |
| Os.12735.1.S1_at   | LOC_Os11g44810 | 3.9305 |
| Os.12201.2.S1_at   | LOC_Os09g27820 | 3.9227 |
| Os.14830.1.S1_a_at | LOC_Os01g63190 | 3.9201 |
| Os.14372.1.S1_at   | LOC_Os03g04220 | 3.9085 |
| Os.50843.1.S1_at   | LOC_Os01g46340 | 3.9063 |
| Os.37729.1.S1_s_at | LOC_Os01g03360 | 3.8852 |
| Os.49225.1.S2_at   | LOC_Os08g42700 | 3.864  |
| Os.17356.1.A1_a_at | LOC_Os11g15060 | 3.8531 |
| Os.14318.1.S1_at   | LOC_Os08g42470 | 3.8312 |

|                     |                |        |
|---------------------|----------------|--------|
| Os.6242.1.S1_s_at   | LOC_Os07g41600 | 3.7979 |
| Os.18450.1.S1_s_at  | LOC_Os05g34700 | 3.7872 |
| Os.12198.1.S1_a_at  | LOC_Os06g20370 | 3.7814 |
| Os.20936.1.S1_a_at  | LOC_Os07g05360 | 3.7751 |
| Os.33604.1.S1_a_at  | LOC_Os07g33480 | 3.7701 |
| Os.37909.1.S1_at    | LOC_Os05g27780 | 3.7617 |
| Os.10733.1.S1_at    | LOC_Os07g38130 | 3.76   |
| Os.7947.1.S1_a_at   | LOC_Os05g31140 | 3.7348 |
| Os.18388.3.S1_at    | LOC_Os01g49650 | 3.7227 |
| Os.38848.1.S1_at    | LOC_Os06g15330 | 3.715  |
| Os.18395.1.S1_s_at  | LOC_Os06g15620 | 3.7085 |
| Os.57456.1.S1_x_at  | LOC_Os01g24710 | 3.6747 |
| Os.7753.1.S1_at     | LOC_Os01g18170 | 3.6697 |
| Os.2368.1.S1_at     | LOC_Os03g60720 | 3.6517 |
| OsAffx.3463.1.S1_at | LOC_Os03g40770 | 3.6489 |
| Os.45916.1.S1_x_at  | LOC_Os01g14850 | 3.6412 |
| Os.264.1.S1_at      | LOC_Os04g59260 | 3.6404 |
| Os.50483.1.S1_at    | LOC_Os04g42860 | 3.6376 |
| Os.8827.1.S1_at     | LOC_Os01g60740 | 3.6273 |
| Os.12822.1.S1_at    | LOC_Os05g44120 | 3.6221 |
| Os.14366.1.S1_s_at  | LOC_Os08g37840 | 3.6181 |
| Os.6275.1.S1_at     | LOC_Os01g67110 | 3.6109 |
| Os.28462.1.S1_s_at  | LOC_Os12g02290 | 3.6108 |
| Os.24972.1.S1_at    | LOC_Os02g09930 | 3.6048 |
| Os.54579.1.S1_x_at  | LOC_Os07g23640 | 3.5872 |
| Os.49519.1.S1_at    | LOC_Os07g46480 | 3.5856 |
| Os.9962.1.S1_s_at   | LOC_Os01g14850 | 3.5791 |
| Os.23412.1.S1_at    | LOC_Os12g41180 | 3.5714 |
| Os.10635.1.S1_s_at  | LOC_Os04g51880 | 3.5698 |
| Os.10678.1.S1_at    | LOC_Os10g05990 | 3.5535 |
| Os.9488.1.S1_at     | LOC_Os08g01220 | 3.5498 |
| Os.4613.1.S1_at     | LOC_Os02g51040 | 3.5417 |
| Os.37876.1.S1_at    | LOC_Os10g39920 | 3.516  |
| Os.7578.1.S1_at     | LOC_Os03g14140 | 3.5111 |
| Os.28030.1.S1_s_at  | LOC_Os06g48160 | 3.5015 |
| Os.6417.1.S1_at     | LOC_Os07g37850 | 3.4919 |
| Os.28406.1.S1_at    | LOC_Os09g11480 | 3.4912 |
| Os.53726.1.S1_at    | LOC_Os07g05370 | 3.487  |
| Os.12838.1.S1_at    | LOC_Os06g49760 | 3.4724 |
| Os.49627.1.S1_at    | LOC_Os06g37150 | 3.4356 |
| Os.45916.1.S1_s_at  | LOC_Os01g14850 | 3.4337 |
| Os.22594.1.S1_at    | LOC_Os01g03390 | 3.4275 |
| Os.8385.1.S1_s_at   | LOC_Os10g05970 | 3.3937 |
| Os.6442.1.S1_at     | LOC_Os03g08790 | 3.393  |

|                        |                |        |
|------------------------|----------------|--------|
| Os.37890.1.S1_s_at     | LOC_Os11g24070 | 3.387  |
| Os.5299.2.S1_a_at      | LOC_Os05g37970 | 3.3845 |
| Os.9312.1.S1_at        | LOC_Os03g01270 | 3.3825 |
| Os.22839.1.S2_at       | LOC_Os06g48200 | 3.3785 |
| Os.18406.1.S1_at       | LOC_Os07g40220 | 3.3758 |
| Os.20617.2.S1_s_at     | LOC_Os03g20710 | 3.3685 |
| Os.37820.1.S1_x_at     | LOC_Os10g06000 | 3.3657 |
| Os.37890.1.S1_at       | LOC_Os11g24070 | 3.3579 |
| OsAffx.14465.1.S1_s_at | LOC_Os04g58120 | 3.3551 |
| Os.46021.1.S1_at       | LOC_Os01g46600 | 3.3304 |
| OsAffx.26492.1.S1_s_at | LOC_Os04g46830 | 3.3119 |
| OsAffx.27219.1.S1_at   | LOC_Os05g38290 | 3.2998 |
| Os.21524.1.S1_at       | LOC_Os10g05820 | 3.2852 |
| Os.7566.1.S1_at        | LOC_Os04g53950 | 3.2801 |
| Os.43929.1.S1_s_at     | LOC_Os06g15430 | 3.2759 |
| Os.12286.1.S1_at       | LOC_Os03g52690 | 3.2752 |
| Os.32141.1.S1_at       | LOC_Os03g49610 | 3.2617 |
| Os.7938.1.S1_at        | LOC_Os04g59190 | 3.2575 |
| Os.7947.1.S1_x_at      | LOC_Os05g31140 | 3.2568 |
| Os.27474.1.S1_at       | LOC_Os05g16430 | 3.2504 |
| Os.54579.1.S1_s_at     | LOC_Os07g23640 | 3.2469 |
| Os.19843.1.S1_at       | LOC_Os01g55100 | 3.2336 |
| Os.9551.1.S1_at        | LOC_Os05g43690 | 3.2134 |
| Os.5297.1.S1_at        | LOC_Os10g22590 | 3.1866 |
| Os.10578.1.A1_at       | LOC_Os03g20410 | 3.1825 |
| Os.53609.1.S1_s_at     | LOC_Os01g10490 | 3.1822 |
| Os.9172.2.S1_at        | LOC_Os02g02400 | 3.1771 |
| Os.28032.1.A1_at       | LOC_Os01g21070 | 3.168  |
| Os.12387.1.S1_at       | LOC_Os04g39150 | 3.1656 |
| Os.10109.1.S1_at       | LOC_Os12g40890 | 3.165  |
| Os.4893.1.S1_at        | LOC_Os05g29810 | 3.1466 |
| Os.20617.2.S1_x_at     | LOC_Os07g46280 | 3.1423 |
| Os.48829.1.A1_at       | LOC_Os03g04660 | 3.1388 |
| Os.38378.1.S1_a_at     | LOC_Os01g01340 | 3.1333 |
| Os.8385.2.S1_x_at      | LOC_Os10g06000 | 3.1323 |
| Os.12452.1.S1_s_at     | LOC_Os08g36910 | 3.113  |
| Os.8263.1.S1_s_at      | LOC_Os04g32030 | 3.1115 |
| Os.13559.1.S1_at       | LOC_Os03g06940 | 3.109  |
| Os.55270.1.S1_s_at     | LOC_Os04g54210 | 3.1003 |
| Os.26971.1.S1_at       | LOC_Os01g66600 | 3.0864 |
| OsAffx.12022.1.S1_s_at | LOC_Os02g13600 | 3.0632 |
| Os.4380.1.S1_at        | LOC_Os11g02350 | 3.0617 |
| Os.49654.1.S1_at       | LOC_Os03g18970 | 3.0586 |
| Os.32022.1.S1_at       | LOC_Os07g37620 | 3.0449 |

|                        |                |        |
|------------------------|----------------|--------|
| Os.27140.1.S1_a_at     | LOC_Os03g61910 | 3.0436 |
| Os.9782.1.S1_at        | LOC_Os09g19930 | 3.0409 |
| Os.20617.1.S1_at       | LOC_Os07g46280 | 3.031  |
| Os.38309.1.S1_at       | LOC_Os06g36390 | 3.0274 |
| Os.10620.1.S1_at       | LOC_Os05g07940 | 3.0239 |
| Os.14153.2.S1_x_at     | LOC_Os08g44840 | 3.021  |
| OsAffx.27459.3.S1_x_at | LOC_Os06g05010 | 3.0201 |
| Os.46435.1.S1_s_at     | LOC_Os04g39110 | 3.014  |
| Os.15191.1.S1_s_at     | LOC_Os05g41220 | 3.0113 |
| Os.6423.1.S1_at        | LOC_Os08g39330 | 3.0079 |
| Os.35123.1.S1_at       | LOC_Os01g22230 | 2.9788 |
| Os.30886.1.S1_at       | LOC_Os03g61360 | 2.9633 |
| Os.22839.1.S1_at       | LOC_Os06g48200 | 2.9553 |
| Os.34387.1.S1_at       | LOC_Os01g24790 | 2.9519 |
| Os.9836.1.S1_at        | LOC_Os11g10590 | 2.9486 |
| Os.52136.1.S1_at       | LOC_Os03g59430 | 2.9425 |
| Os.14139.1.S1_at       | LOC_Os04g31340 | 2.9409 |
| Os.38985.1.S1_at       | LOC_Os07g02060 | 2.9387 |
| Os.17294.1.S1_a_at     | LOC_Os03g29540 | 2.938  |
| Os.52605.1.S1_at       | LOC_Os12g38120 | 2.9282 |
| Os.12244.1.S1_at       | LOC_Os03g15960 | 2.9178 |
| Os.49209.1.S1_at       | LOC_Os05g43140 | 2.9147 |
| Os.5831.1.S1_at        | LOC_Os01g55220 | 2.9139 |
| Os.53973.1.S1_at       | LOC_Os02g50040 | 2.9054 |
| Os.11534.1.S1_at       | LOC_Os05g10670 | 2.8936 |
| Os.6542.1.S1_at        | LOC_Os03g08630 | 2.8926 |
| Os.12170.1.S1_at       | LOC_Os03g47940 | 2.8917 |
| Os.7126.1.S1_at        | LOC_Os01g18050 | 2.8837 |
| Os.9080.1.S1_at        | LOC_Os03g08550 | 2.8693 |
| Os.5045.1.S1_at        | LOC_Os01g03680 | 2.8577 |
| Os.46881.1.S1_at       | LOC_Os10g39770 | 2.856  |
| Os.27506.1.A1_at       | LOC_Os11g15340 | 2.8554 |
| Os.23971.1.S1_a_at     | LOC_Os01g14050 | 2.8521 |
| Os.22197.1.S1_at       | LOC_Os06g20200 | 2.8474 |
| Os.623.3.S1_x_at       | LOC_Os01g09640 | 2.8429 |
| Os.26705.1.S1_at       | LOC_Os07g38590 | 2.8415 |
| OsAffx.12645.1.S1_s_at | LOC_Os02g54870 | 2.8394 |
| Os.12835.1.S1_at       | LOC_Os09g35700 | 2.8383 |
| Os.962.1.S1_at         | LOC_Os01g03490 | 2.8262 |
| Os.313.1.S1_a_at       | LOC_Os02g49720 | 2.8261 |
| Os.12186.1.S1_at       | LOC_Os03g21040 | 2.825  |
| Os.6318.1.S1_at        | LOC_Os05g45020 | 2.822  |
| Os.5117.1.S1_at        | LOC_Os06g46350 | 2.8215 |
| Os.43963.1.S1_at       | LOC_Os07g33580 | 2.8168 |

|                        |                |        |
|------------------------|----------------|--------|
| Os.12823.1.S1_at       | LOC_Os04g16450 | 2.8156 |
| Os.12326.1.S1_s_at     | LOC_Os07g42160 | 2.8152 |
| Os.4671.1.S1_a_at      | LOC_Os01g24710 | 2.8114 |
| Os.50062.1.S1_at       | LOC_Os03g21730 | 2.8085 |
| Os.12198.1.S1_at       | LOC_Os06g20370 | 2.8049 |
| Os.15914.1.S1_at       | LOC_Os09g23350 | 2.804  |
| Os.4653.1.S1_at        | LOC_Os01g03340 | 2.8003 |
| Os.29377.1.S1_at       | LOC_Os06g22290 | 2.7988 |
| Os.10839.1.S1_at       | LOC_Os03g16350 | 2.7981 |
| Os.10403.1.S1_at       | LOC_Os03g55350 | 2.7912 |
| Os.37860.1.S1_at       | LOC_Os11g02330 | 2.7889 |
| OsAffx.12740.1.S1_s_at | LOC_Os03g05520 | 2.7846 |
| Os.8916.1.S1_at        | LOC_Os02g50820 | 2.7845 |
| Os.26511.1.S1_at       | LOC_Os04g49370 | 2.7836 |
| Os.151.1.S1_x_at       | LOC_Os03g51690 | 2.7769 |
| Os.1818.1.S1_at        | LOC_Os01g45640 | 2.7695 |
| Os.7727.1.S1_at        | LOC_Os05g11910 | 2.7676 |
| Os.10651.1.S1_at       | LOC_Os02g41910 | 2.7662 |
| Os.46582.1.S1_at       | LOC_Os10g36180 | 2.7662 |
| Os.51775.1.S1_at       | LOC_Os12g05210 | 2.745  |
| Os.7348.1.S1_at        | LOC_Os08g38910 | 2.7434 |
| Os.15076.1.S1_at       | LOC_Os04g02900 | 2.7417 |
| Os.32248.1.S1_at       | LOC_Os01g09860 | 2.7416 |
| Os.11398.1.S1_at       | LOC_Os10g05980 | 2.7335 |
| Os.9797.1.S1_at        | LOC_Os11g32260 | 2.73   |
| Os.9172.2.S1_x_at      | LOC_Os02g02400 | 2.7297 |
| Os.38408.1.S1_a_at     | LOC_Os09g21230 | 2.7242 |
| OsAffx.14326.1.S1_s_at | LOC_Os04g48490 | 2.713  |
| Os.31975.1.S1_x_at     | LOC_Os05g10670 | 2.7094 |
| Os.8458.1.S1_s_at      | LOC_Os04g05050 | 2.707  |
| Os.2367.1.S1_at        | LOC_Os03g21820 | 2.7048 |
| Os.38346.1.S1_x_at     | LOC_Os01g36350 | 2.6988 |
| Os.25599.1.A1_at       | LOC_Os08g42440 | 2.6966 |
| Os.46540.1.S1_at       | LOC_Os10g41060 | 2.6925 |
| Os.4281.1.S1_x_at      | LOC_Os06g03830 | 2.6919 |
| Os.34515.1.A1_at       | LOC_Os12g23780 | 2.6817 |
| Os.12560.1.S1_s_at     | LOC_Os01g02060 | 2.6771 |
| Os.23971.2.S1_x_at     | LOC_Os01g14050 | 2.6751 |
| Os.11327.1.S1_at       | LOC_Os03g18130 | 2.6694 |
| Os.52857.1.S1_at       | LOC_Os05g13650 | 2.666  |
| Os.4149.2.S1_x_at      | LOC_Os03g50810 | 2.6618 |
| Os.12252.1.S1_at       | LOC_Os03g41060 | 2.6606 |
| OsAffx.27815.1.S1_s_at | LOC_Os06g24990 | 2.6604 |
| Os.14539.1.S1_at       | LOC_Os07g01600 | 2.6565 |



|                        |                |        |
|------------------------|----------------|--------|
| Os.8367.1.S1_at        | LOC_Os08g02490 | 2.6487 |
| Os.12812.1.S1_at       | LOC_Os05g28210 | 2.6472 |
| Os.25952.1.S1_at       | LOC_Os05g27780 | 2.6471 |
| Os.4614.1.S1_a_at      | LOC_Os02g40260 | 2.6451 |
| Os.623.2.S1_x_at       | LOC_Os01g09640 | 2.645  |
| Os.10736.1.S1_at       | LOC_Os06g05440 | 2.6396 |
| Os.52593.1.S1_s_at     | LOC_Os09g21230 | 2.6364 |
| Os.37692.1.S1_at       | LOC_Os07g44070 | 2.6223 |
| Os.43963.1.S1_x_at     | LOC_Os07g33580 | 2.6179 |
| Os.51775.1.S1_x_at     | LOC_Os12g05210 | 2.6064 |
| Os.32478.1.S1_at       | LOC_Os01g46400 | 2.6004 |
| Os.17446.1.S1_at       | LOC_Os04g48270 | 2.5974 |
| OsAffx.30538.1.S1_x_at | LOC_Os10g26150 | 2.593  |
| Os.6219.1.S1_at        | LOC_Os04g45330 | 2.587  |
| Os.19480.1.S1_at       | LOC_Os03g20870 | 2.5844 |
| Os.23145.1.S1_at       | LOC_Os08g03310 | 2.5828 |
| Os.32292.1.S1_at       | LOC_Os01g36240 | 2.5826 |
| Os.12400.2.S1_x_at     | LOC_Os08g30020 | 2.5771 |
| Os.5913.1.S1_at        | LOC_Os04g57970 | 2.5764 |
| Os.21231.1.S1_at       | LOC_Os01g38610 | 2.5699 |
| Os.32078.1.S1_at       | LOC_Os01g51140 | 2.5698 |
| Os.17136.1.S1_at       | LOC_Os03g51920 | 2.5681 |
| Os.2750.2.S1_a_at      | LOC_Os10g42230 | 2.5671 |
| Os.51029.1.S1_at       | LOC_Os09g02770 | 2.5644 |
| OsAffx.25285.1.S1_at   | LOC_Os03g29770 | 2.564  |
| Os.27247.1.S1_at       | LOC_Os06g50950 | 2.5588 |
| Os.27331.1.S1_at       | LOC_Os05g36930 | 2.5552 |
| Os.10785.3.S1_at       | LOC_Os10g34480 | 2.5522 |
| Os.51106.1.S1_at       | LOC_Os06g14540 | 2.5473 |
| Os.11831.1.S1_at       | LOC_Os06g13560 | 2.5436 |
| Os.9172.1.S1_x_at      | LOC_Os02g02400 | 2.5431 |
| Os.21634.1.S1_at       | LOC_Os01g55240 | 2.5424 |
| Os.12400.4.S1_at       | LOC_Os08g30020 | 2.5393 |
| Os.35020.1.S1_at       | LOC_Os11g03300 | 2.5391 |
| Os.26698.1.S1_a_at     | LOC_Os01g19820 | 2.5371 |
| Os.56528.1.S1_at       | LOC_Os05g42210 | 2.5349 |
| Os.36264.1.S1_x_at     | LOC_Os01g53750 | 2.534  |
| Os.8353.1.S1_at        | LOC_Os01g68770 | 2.5242 |
| Os.10784.1.S1_at       | LOC_Os02g26700 | 2.522  |
| Os.14078.1.S1_s_at     | LOC_Os10g07210 | 2.5178 |
| OsAffx.4277.1.S1_s_at  | LOC_Os05g08750 | 2.5146 |
| Os.54530.1.S1_at       | LOC_Os06g49100 | 2.5143 |
| Os.15841.1.S1_a_at     | LOC_Os11g05290 | 2.5091 |
| Os.12077.1.S1_at       | LOC_Os08g44270 | 2.5066 |

|                        |                |        |
|------------------------|----------------|--------|
| Os.22907.1.S1_at       | LOC_Os05g50190 | 2.501  |
| Os.21574.1.S1_a_at     | LOC_Os03g46660 | 2.479  |
| Os.27974.1.S1_at       | LOC_Os01g55000 | 2.478  |
| Os.54793.1.S1_at       | LOC_Os02g42950 | 2.4766 |
| Os.5095.1.S1_at        | LOC_Os07g40130 | 2.4747 |
| OsAffx.12986.1.S1_at   | LOC_Os03g22200 | 2.4746 |
| Os.7611.1.S1_at        | LOC_Os03g06670 | 2.4627 |
| Os.50239.1.S1_a_at     | LOC_Os05g30220 | 2.4616 |
| Os.57465.1.S1_x_at     | LOC_Os03g28330 | 2.459  |
| Os.7649.1.S1_at        | LOC_Os12g05040 | 2.4576 |
| Os.17149.1.S1_at       | LOC_Os03g60910 | 2.4509 |
| OsAffx.21790.1.S1_at   | LOC_Os01g67540 | 2.4469 |
| Os.10675.1.A1_at       | LOC_Os01g68140 | 2.4458 |
| Os.26082.1.S1_s_at     | LOC_Os02g15810 | 2.4438 |
| Os.10797.1.S1_at       | LOC_Os02g01380 | 2.4438 |
| OsAffx.22469.1.S1_x_at | LOC_Os07g07040 | 2.4392 |
| Os.12994.1.S1_at       | LOC_Os12g38400 | 2.431  |
| Os.10300.1.S1_x_at     | LOC_Os01g01840 | 2.43   |
| Os.5577.1.S1_at        | LOC_Os11g08300 | 2.4232 |
| Os.7916.1.S1_at        | LOC_Os01g59150 | 2.42   |
| Os.2225.1.S1_at        | LOC_Os04g44870 | 2.4132 |
| OsAffx.28387.1.S1_s_at | LOC_Os07g10420 | 2.4089 |
| Os.17584.1.S1_at       | LOC_Os02g56860 | 2.4084 |
| Os.37213.1.S1_at       | LOC_Os07g29310 | 2.3995 |
| Os.53458.1.S1_at       | LOC_Os09g17560 | 2.3993 |
| Os.48101.1.S1_at       | LOC_Os04g54810 | 2.3929 |
| Os.5500.1.S1_s_at      | LOC_Os08g23180 | 2.3884 |
| Os.6656.1.S1_at        | LOC_Os02g18410 | 2.385  |
| Os.5467.1.S1_at        | LOC_Os04g43990 | 2.3835 |
| Os.2344.1.S1_at        | LOC_Os10g28230 | 2.381  |
| Os.53396.1.S1_at       | LOC_Os07g08390 | 2.3747 |
| Os.16088.1.S1_x_at     | LOC_Os07g48420 | 2.3733 |
| Os.15269.1.S1_at       | LOC_Os03g04240 | 2.3719 |
| Os.49826.1.S1_at       | LOC_Os04g31790 | 2.3662 |
| Os.46187.1.S1_at       | LOC_Os07g40940 | 2.363  |
| Os.49708.1.S1_at       | LOC_Os06g46680 | 2.3546 |
| Os.24471.1.S1_at       | LOC_Os07g30760 | 2.3536 |
| OsAffx.17970.1.S1_at   | LOC_Os09g31080 | 2.3508 |
| Os.20548.1.S1_at       | LOC_Os04g51680 | 2.3496 |
| Os.38249.2.S1_at       | LOC_Os01g38530 | 2.3478 |
| Os.45997.1.S1_x_at     | LOC_Os01g45640 | 2.3442 |
| Os.26811.1.A1_at       | LOC_Os06g39780 | 2.3429 |
| Os.5594.1.S1_at        | LOC_Os05g48340 | 2.3302 |
| Os.26957.1.A1_a_at     | LOC_Os08g10080 | 2.3277 |

|                        |                |        |
|------------------------|----------------|--------|
| Os.18257.1.S1_at       | LOC_Os07g10840 | 2.3245 |
| Os.855.1.S1_at         | LOC_Os01g03730 | 2.3244 |
| Os.5318.1.S1_a_at      | LOC_Os10g42610 | 2.3223 |
| Os.14092.1.S1_at       | LOC_Os02g44710 | 2.3204 |
| Os.11331.1.S1_at       | LOC_Os08g10500 | 2.3154 |
| Os.31975.1.S1_at       | LOC_Os05g10670 | 2.3107 |
| Os.12735.1.S1_s_at     | LOC_Os11g44810 | 2.3101 |
| Os.1564.1.S1_at        | LOC_Os01g22380 | 2.3095 |
| Os.19849.1.S1_at       | LOC_Os01g56930 | 2.3048 |
| Os.11252.1.S1_at       | LOC_Os02g37160 | 2.3038 |
| Os.49690.1.S1_s_at     | LOC_Os07g04190 | 2.3029 |
| Os.27379.1.S1_at       | LOC_Os08g44360 | 2.2989 |
| Os.48287.1.S1_at       | LOC_Os04g38570 | 2.2973 |
| Os.27509.1.S1_at       | LOC_Os01g53790 | 2.2963 |
| Os.25677.1.S1_at       | LOC_Os03g28330 | 2.2932 |
| OsAffx.10845.1.S1_s_at | LOC_Os06g11860 | 2.2894 |
| Os.23125.1.S1_at       | LOC_Os03g19780 | 2.2888 |
| Os.15199.1.S1_at       | LOC_Os08g14860 | 2.2884 |
| Os.53766.1.S1_at       | LOC_Os08g37690 | 2.283  |
| Os.20306.1.S1_at       | LOC_Os04g44600 | 2.2769 |
| Os.7705.1.S1_at        | LOC_Os04g54300 | 2.2704 |
| Os.32021.1.S1_at       | LOC_Os05g13620 | 2.2671 |
| OsAffx.14380.1.S1_s_at | LOC_Os04g52670 | 2.2661 |
| Os.18511.1.S1_at       | LOC_Os10g07210 | 2.261  |
| Os.623.1.S1_x_at       | LOC_Os05g10690 | 2.2578 |
| Os.8403.1.S1_s_at      | LOC_Os12g03470 | 2.2531 |
| Os.51241.1.S1_at       | LOC_Os11g35310 | 2.2528 |
| Os.15580.1.S1_at       | LOC_Os03g42600 | 2.2503 |
| Os.29966.1.S1_at       | LOC_Os06g04760 | 2.2499 |
| Os.6335.1.S1_at        | LOC_Os11g13670 | 2.249  |
| Os.15713.1.S1_a_at     | LOC_Os04g42620 | 2.2488 |
| Os.30886.1.S1_x_at     | LOC_Os03g61360 | 2.2479 |
| Os.2678.1.S1_at        | LOC_Os02g13870 | 2.2393 |
| Os.9220.2.S1_x_at      | LOC_Os04g54930 | 2.2374 |
| Os.15008.1.S1_at       | LOC_Os05g35460 | 2.2368 |
| Os.22360.1.S1_at       | LOC_Os03g15020 | 2.2366 |
| Os.7610.1.S1_a_at      | LOC_Os08g04780 | 2.2358 |
| Os.11762.1.S2_x_at     | LOC_Os08g45030 | 2.2341 |
| Os.15938.1.S1_at       | LOC_Os03g17790 | 2.2328 |
| Os.52202.1.S1_at       | LOC_Os03g22450 | 2.2323 |
| Os.21335.1.A1_at       | LOC_Os12g42420 | 2.2316 |
| Os.18249.1.S1_at       | LOC_Os04g45720 | 2.2282 |
| Os.14289.1.S1_at       | LOC_Os04g45750 | 2.225  |
| Os.9546.1.S1_x_at      | LOC_Os06g41120 | 2.217  |

|                       |                |        |
|-----------------------|----------------|--------|
| Os.9303.1.S1_at       | LOC_Os02g46460 | 2.2161 |
| Os.51757.1.S1_at      | LOC_Os06g26270 | 2.2126 |
| Os.37689.1.S1_at      | LOC_Os12g38440 | 2.1961 |
| Os.10196.1.S1_at      | LOC_Os01g58320 | 2.1949 |
| Os.4223.1.S1_s_at     | LOC_Os06g07220 | 2.1937 |
| Os.4671.2.S1_a_at     | LOC_Os04g42470 | 2.1912 |
| Os.55554.1.S1_at      | LOC_Os08g38270 | 2.1909 |
| Os.8403.1.S1_a_at     | LOC_Os12g03470 | 2.1904 |
| Os.5087.1.S1_at       | LOC_Os11g03780 | 2.1884 |
| Os.27483.1.S1_at      | LOC_Os08g13440 | 2.1859 |
| Os.11476.1.S1_at      | LOC_Os06g10230 | 2.1855 |
| Os.12110.1.S1_at      | LOC_Os12g02530 | 2.1788 |
| Os.55420.1.A1_x_at    | LOC_Os11g38440 | 2.171  |
| Os.32736.1.S1_at      | LOC_Os03g56820 | 2.1688 |
| Os.12286.1.S2_a_at    | LOC_Os03g52690 | 2.168  |
| Os.20775.1.S1_at      | LOC_Os09g32510 | 2.1652 |
| Os.17271.1.S1_at      | LOC_Os12g07310 | 2.1644 |
| OsAffx.25290.1.S1_at  | LOC_Os03g29970 | 2.1638 |
| Os.7699.1.S1_at       | LOC_Os10g22050 | 2.1603 |
| Os.3396.1.S1_at       | LOC_Os06g49880 | 2.1583 |
| Os.5812.1.S1_at       | LOC_Os03g20500 | 2.1492 |
| Os.20079.1.S2_at      | LOC_Os11g25170 | 2.1461 |
| Os.55800.1.S1_at      | LOC_Os04g37980 | 2.1452 |
| Os.27279.1.A1_at      | LOC_Os03g26870 | 2.145  |
| Os.32267.1.S1_at      | LOC_Os01g56330 | 2.1429 |
| Os.9975.1.S1_at       | LOC_Os03g17200 | 2.1422 |
| Os.9031.1.S1_a_at     | LOC_Os08g30730 | 2.1392 |
| Os.49751.1.S1_at      | LOC_Os03g51970 | 2.1371 |
| Os.7348.1.S1_a_at     | LOC_Os08g38910 | 2.135  |
| Os.6210.1.S1_at       | LOC_Os03g56270 | 2.1348 |
| Os.54829.1.S1_at      | LOC_Os08g02220 | 2.1347 |
| Os.18503.1.S1_s_at    | LOC_Os09g22410 | 2.1291 |
| Os.10544.1.S1_at      | LOC_Os03g53630 | 2.1286 |
| Os.7272.1.S1_at       | LOC_Os10g06720 | 2.1275 |
| Os.27712.2.S1_x_at    | LOC_Os06g48510 | 2.1224 |
| Os.23158.1.S1_at      | LOC_Os05g02820 | 2.1184 |
| Os.57477.1.S1_x_at    | LOC_Os11g47760 | 2.1165 |
| Os.14561.1.S1_at      | LOC_Os12g42760 | 2.113  |
| Os.27688.1.A1_at      | LOC_Os04g21350 | 2.1125 |
| OsAffx.2920.1.S1_s_at | LOC_Os02g39720 | 2.1109 |
| OsAffx.12379.1.S1_at  | LOC_Os02g36850 | 2.1088 |
| Os.54934.1.S1_at      | LOC_Os05g37060 | 2.1081 |
| Os.52394.2.S1_at      | LOC_Os12g39440 | 2.1059 |
| Os.35495.1.S1_at      | LOC_Os01g16030 | 2.1052 |

|                      |                |        |
|----------------------|----------------|--------|
| Os.27395.1.S1_a_at   | LOC_Os04g57760 | 2.1007 |
| Os.55444.1.S1_at     | LOC_Os03g47270 | 2.0968 |
| OsAffx.3970.1.S1_at  | LOC_Os04g31760 | 2.089  |
| Os.10246.3.S1_at     | LOC_Os06g06460 | 2.0882 |
| Os.36960.1.S1_at     | LOC_Os01g49230 | 2.0856 |
| OsAffx.20681.1.S1_at | LOC_Os10g09710 | 2.0833 |
| Os.54443.1.S1_at     | LOC_Os07g42610 | 2.0831 |
| Os.21243.1.S1_at     | LOC_Os02g36490 | 2.082  |
| Os.18057.1.A1_at     | LOC_Os02g50640 | 2.0768 |
| Os.17916.1.S1_at     | LOC_Os05g12630 | 2.0765 |
| Os.51616.1.S1_at     | LOC_Os03g16600 | 2.0753 |
| Os.52428.1.S1_x_at   | LOC_Os06g43510 | 2.0751 |
| Os.12363.1.S1_at     | LOC_Os04g58200 | 2.0746 |
| Os.11286.1.A1_at     | LOC_Os04g13140 | 2.0738 |
| Os.21812.2.S1_a_at   | LOC_Os03g12250 | 2.0721 |
| Os.8178.1.S1_at      | LOC_Os11g37970 | 2.0698 |
| Os.53969.1.S1_at     | LOC_Os03g22700 | 2.067  |
| Os.39943.2.A1_at     | LOC_Os10g05680 | 2.0661 |
| Os.1475.1.S1_at      | LOC_Os01g09540 | 2.0644 |
| Os.12787.1.S1_at     | LOC_Os10g18340 | 2.064  |
| Os.7216.1.S1_at      | LOC_Os10g25780 | 2.0593 |
| Os.8456.1.S1_at      | LOC_Os05g10210 | 2.0563 |
| Os.14381.2.S1_x_at   | LOC_Os03g28300 | 2.0539 |
| Os.51228.2.A1_at     | LOC_Os03g14130 | 2.0539 |
| Os.14232.1.S1_at     | LOC_Os01g46120 | 2.0529 |
| Os.11785.1.S1_at     | LOC_Os06g47700 | 2.0474 |
| Os.11432.1.S1_s_at   | LOC_Os01g62360 | 2.0468 |
| Os.13708.1.S1_at     | LOC_Os03g14250 | 2.0466 |
| Os.10880.1.S1_at     | LOC_Os04g45270 | 2.0461 |
| Os.9546.1.S1_at      | LOC_Os06g41120 | 2.0445 |
| Os.38604.1.S1_s_at   | LOC_Os11g14220 | 2.0442 |
| Os.11604.1.S1_at     | LOC_Os10g42190 | 2.0434 |
| Os.21886.1.S1_at     | LOC_Os03g59750 | 2.0406 |
| Os.49042.1.A1_s_at   | LOC_Os01g09620 | 2.0399 |
| Os.33534.1.S1_s_at   | LOC_Os07g06620 | 2.0373 |
| OsAffx.17937.1.S1_at | LOC_Os09g27670 | 2.0373 |
| Os.6291.1.S1_x_at    | LOC_Os06g47600 | 2.0357 |
| OsAffx.6446.1.S1_at  | LOC_Os09g29960 | 2.0355 |
| Os.6592.1.S1_a_at    | LOC_Os05g04380 | 2.0343 |
| Os.53679.1.S1_s_at   | LOC_Os09g31080 | 2.034  |
| Os.11997.1.S1_at     | LOC_Os07g48510 | 2.0331 |
| Os.24851.1.S1_at     | LOC_Os02g33420 | 2.0328 |
| Os.14122.1.S1_at     | LOC_Os01g13210 | 2.0316 |
| Os.315.1.S1_at       | LOC_Os03g39710 | 2.0313 |

|                    |                |        |
|--------------------|----------------|--------|
| Os.14567.1.S1_at   | LOC_Os02g39580 | 2.0256 |
| Os.19401.1.S1_at   | LOC_Os03g04100 | 2.0225 |
| Os.12767.1.S1_a_at | LOC_Os07g34570 | 2.0195 |
| Os.12391.1.S1_a_at | LOC_Os02g54820 | 2.0143 |
| Os.39943.2.A1_x_at | LOC_Os10g05680 | 2.0141 |
| Os.16999.1.A1_at   | LOC_Os03g24950 | 2.0117 |
| Os.4958.1.A1_at    | LOC_Os01g68830 | 2.0062 |
| Os.39828.1.A1_s_at | LOC_Os03g52690 | 2.0005 |
| Os.37717.1.A1_s_at | LOC_Os05g15770 | 2.0001 |

---

**Table S3. Down-regulated genes in *slac7* leaves.**

| <b>ProbeSet ID</b>   | <b>OsGI</b>    | <b>Fold</b> |
|----------------------|----------------|-------------|
| Os.16025.1.S1_s_at   | LOC_Os06g39960 | 0.4958      |
| Os.51098.1.S1_at     | LOC_Os12g05890 | 0.4948      |
| Os.15283.1.S1_at     | LOC_Os04g57310 | 0.4941      |
| Os.4773.1.S1_at      | LOC_Os06g04240 | 0.4935      |
| Os.28798.1.S1_at     | LOC_Os01g58310 | 0.4905      |
| Os.35510.1.S1_at     | LOC_Os02g01220 | 0.4881      |
| Os.17108.1.S1_at     | LOC_Os12g38170 | 0.4826      |
| Os.20627.2.S1_at     | LOC_Os07g33620 | 0.4819      |
| Os.51226.1.S1_at     | LOC_Os03g52910 | 0.4816      |
| Os.4940.1.S1_at      | LOC_Os06g46970 | 0.4812      |
| Os.51753.1.A1_at     | LOC_Os12g35340 | 0.4806      |
| Os.32263.1.S1_at     | LOC_Os01g55310 | 0.4794      |
| Os.6864.1.S1_at      | LOC_Os01g61070 | 0.4748      |
| Os.10305.1.S1_at     | LOC_Os08g41880 | 0.4733      |
| OsAffx.28017.1.S1_at | LOC_Os06g39960 | 0.4695      |
| Os.51546.1.S1_at     | LOC_Os03g08520 | 0.4628      |
| Os.54420.1.S1_at     | LOC_Os01g16980 | 0.4577      |
| Os.2245.1.S1_at      | LOC_Os05g43040 | 0.4574      |
| Os.54420.1.S1_x_at   | LOC_Os01g16980 | 0.4571      |
| Os.15856.1.S1_at     | LOC_Os10g06630 | 0.4524      |
| Os.51227.1.S1_x_at   | LOC_Os04g27790 | 0.4497      |
| Os.28649.1.S1_at     | LOC_Os01g37460 | 0.4488      |
| Os.606.1.S1_at       | LOC_Os06g04220 | 0.4437      |
| Os.15281.1.S1_x_at   | LOC_Os07g46930 | 0.4436      |
| OsAffx.7250.1.S1_at  | LOC_Os11g29740 | 0.4406      |
| Os.46397.1.S1_x_at   | LOC_Os10g35490 | 0.4387      |
| Os.20183.1.S1_at     | LOC_Os07g19320 | 0.4386      |
| Os.4604.1.S1_at      | LOC_Os03g15460 | 0.4307      |
| OsAffx.12052.1.S1_at | LOC_Os02g15280 | 0.4302      |
| Os.12713.1.S2_a_at   | LOC_Os01g03320 | 0.424       |
| Os.50587.1.S1_at     | LOC_Os05g03960 | 0.4221      |
| Os.49761.1.S1_at     | LOC_Os03g54170 | 0.4164      |
| Os.20230.1.S1_at     | LOC_Os11g37950 | 0.4129      |
| Os.46151.1.S1_at     | LOC_Os10g36200 | 0.3972      |
| OsAffx.26230.1.S1_at | LOC_Os04g29550 | 0.3969      |
| Os.6776.1.S1_at      | LOC_Os07g35480 | 0.3835      |
| Os.1479.1.S1_at      | LOC_Os07g48980 | 0.3825      |
| OsAffx.4953.1.S1_at  | LOC_Os06g28630 | 0.3721      |
| Os.10583.1.S1_at     | LOC_Os06g04920 | 0.369       |
| Os.12092.1.S1_at     | LOC_Os09g25810 | 0.3622      |
| Os.52678.1.S1_at     | LOC_Os04g41130 | 0.3542      |
| Os.7507.1.S1_at      | LOC_Os10g02880 | 0.3398      |

|                    |                |        |
|--------------------|----------------|--------|
| Os.48986.1.S1_s_at | LOC_Os05g04000 | 0.3326 |
| Os.9417.1.S1_at    | LOC_Os09g36680 | 0.1463 |
| Os.12922.1.S1_at   | LOC_Os09g36700 | 0.0918 |
| Os.20851.1.A1_x_at | LOC_Os04g48650 | 0.0465 |

---



**Table S4. Gene ontology analysis of differentially expressed genes.**

| GO Term                                                                    | Count <sup>a</sup> | p-Value <sup>b</sup> |
|----------------------------------------------------------------------------|--------------------|----------------------|
| <b>(a) Biological process</b>                                              |                    |                      |
| GO:0005975 carbohydrate metabolic process                                  | 45                 | 2.37E-13             |
| GO:0005488 binding                                                         | 201                | 4.99E-12             |
| GO:0055114 oxidation-reduction process                                     | 52                 | 1.47E-10             |
| GO:0008152 metabolic process                                               | 158                | 1.81E-10             |
| GO:0006869 lipid transport                                                 | 13                 | 2.90E-09             |
| GO:0010876 lipid localization                                              | 13                 | 2.90E-09             |
| GO:0007047 cellular cell wall organization                                 | 16                 | 4.04E-09             |
| GO:0045229 external encapsulating structure organization                   | 16                 | 4.04E-09             |
| GO:0071554 cell wall organization or biogenesis                            | 20                 | 1.24E-08             |
| GO:0070882 cellular cell wall organization or biogenesis                   | 16                 | 3.66E-08             |
| GO:0071555 cell wall organization                                          | 16                 | 1.34E-07             |
| GO:0071702 organic substance transport                                     | 14                 | 7.63E-07             |
| GO:0071840 cellular component organization or biogenesis                   | 28                 | 1.39E-06             |
| GO:0016043 cellular component organization                                 | 24                 | 3.61E-06             |
| GO:0005976 polysaccharide metabolic process                                | 15                 | 5.25E-06             |
| GO:0071841 cellular component organization or biogenesis at cellular level | 23                 | 2.46E-05             |
| GO:0044262 cellular carbohydrate metabolic process                         | 13                 | 6.25E-05             |
| GO:0019566 arabinose metabolic process                                     | 4                  | 6.25E-05             |
| GO:0046373 L-arabinose metabolic process                                   | 4                  | 6.25E-05             |
| GO:0046556 alpha-N-arabinofuranosidase activity                            | 4                  | 6.25E-05             |
| GO:0000003 reproduction                                                    | 11                 | 7.54E-05             |
| GO:0006950 response to stress                                              | 31                 | 9.18E-05             |
| GO:0000272 polysaccharide catabolic process                                | 9                  | 0.000105             |
| GO:0019953 sexual reproduction                                             | 5                  | 0.000105             |
| GO:0044042 glucan metabolic process                                        | 11                 | 0.000286             |
| GO:0044238 primary metabolic process                                       | 101                | 0.000432             |
| GO:0006979 response to oxidative stress                                    | 11                 | 0.000613             |
| GO:0050896 response to stimulus                                            | 37                 | 0.0016               |
| GO:0009251 glucan catabolic process                                        | 5                  | 0.00275              |
| GO:0009056 catabolic process                                               | 19                 | 0.00327              |
| <b>(b) Molecular function</b>                                              |                    |                      |
| GO:0003824 catalytic activity                                              | 194                | 5.58E-17             |
| GO:0016798 hydrolase activity, acting on glycosyl bonds                    | 37                 | 5.58E-17             |
| GO:0004553 hydrolase activity, hydrolyzing O-glycosyl compounds            | 36                 | 7.05E-17             |
| GO:0043167 ion binding                                                     | 90                 | 7.36E-12             |
| GO:0043169 cation binding                                                  | 90                 | 7.36E-12             |
| GO:0016787 hydrolase activity                                              | 82                 | 3.63E-11             |
| GO:0016491 oxidoreductase activity                                         | 53                 | 2.39E-09             |
| GO:0046872 metal ion binding                                               | 74                 | 2.43E-07             |
| GO:0020037 heme binding                                                    | 23                 | 3.12E-06             |

|                                                                    |    |          |
|--------------------------------------------------------------------|----|----------|
| GO:0046906 tetrapyrrole binding                                    | 23 | 4.04E-06 |
| GO:0015923 mannosidase activity                                    | 6  | 1.41E-05 |
| GO:0004567 beta-mannosidase activity                               | 5  | 3.05E-05 |
| GO:0004338 glucan exo-1,3-beta-glucosidase activity                | 4  | 3.21E-05 |
| GO:0080079 cellobiose glucosidase activity                         | 4  | 3.21E-05 |
| GO:0004565 beta-galactosidase activity                             | 6  | 4.94E-05 |
| GO:0015925 galactosidase activity                                  | 6  | 6.13E-05 |
| GO:0047701 beta-L-arabinosidase activity                           | 4  | 6.25E-05 |
| GO:0033907 beta-D-fucosidase activity                              | 4  | 0.000111 |
| GO:0046914 transition metal ion binding                            | 48 | 0.000178 |
| GO:0008289 lipid binding                                           | 8  | 0.000428 |
| GO:0004867 serine-type endopeptidase inhibitor activity            | 6  | 0.000645 |
| GO:0005506 iron ion binding                                        | 18 | 0.000657 |
| GO:0004601 peroxidase activity                                     | 11 | 0.000781 |
| GO:0016684 oxidoreductase activity, acting on peroxide as acceptor | 11 | 0.000781 |
| GO:0016762 xyloglucan:xyloglucosyl transferase activity            | 5  | 0.00139  |
| GO:0004866 endopeptidase inhibitor activity                        | 6  | 0.00176  |
| GO:0030414 peptidase inhibitor activity                            | 6  | 0.00176  |
| GO:0061134 peptidase regulator activity                            | 6  | 0.00176  |
| GO:0061135 endopeptidase regulator activity                        | 6  | 0.00176  |
| GO:0016209 antioxidant activity                                    | 11 | 2.54E-03 |
| GO:0033897 ribonuclease T2 activity                                | 3  | 0.00745  |
| GO:0004096 catalase activity                                       | 3  | 0.00992  |
| <b>(c) Cellular component</b>                                      |    |          |
| GO:0005576 extracellular region                                    | 39 | 2.81E-26 |
| GO:0005618 cell wall                                               | 15 | 1.47E-08 |
| GO:0030312 external encapsulating structure                        | 15 | 1.09E-07 |
| GO:0048046 apoplast                                                | 11 | 4.48E-06 |
| GO:0071944 cell periphery                                          | 16 | 0.000139 |
| GO:0009514 glyoxysome                                              | 3  | 0.00992  |

**Note:** The listed terms is top ten overrepresented GO terms according to the low p-value. <sup>a</sup> Count of GO terms in the differential expressed genes in the *slac7* and wild-type. <sup>b</sup> The p-value was calculated using the molecule annotation system (MAS) 3.0 (CapitalBio).

**Table S5. RT-qPCR verified differential expression of the genes initially identified by microarray analysis.**

| <b>Gene category</b>            | <b>LOC NO.</b> | <b>Fold</b>                                           | <b>Gene Function Annotation</b>                                      |
|---------------------------------|----------------|-------------------------------------------------------|----------------------------------------------------------------------|
| <b>Malate metabolism</b>        | LOC_Os04g40990 | 12.7                                                  | Malate synthase, glyoxysomal, putative, expressed                    |
|                                 | LOC_Os04g43710 | 8.6                                                   | Phosphoenolpyruvate carboxylase kinase 4, putative, expressed        |
|                                 | LOC_Os05g48200 | 13.9                                                  | Glutamate synthase, chloroplast precursor, putative, expressed       |
| <b>Development related</b>      | LOC_Os04g48650 | 0.2                                                   | Retrotransposon protein, putative, unclassified                      |
|                                 | LOC_Os06g13390 | 0.1                                                   | SAM dependent carboxyl methyltransferase family protein              |
|                                 | LOC_Os11g15060 | 7.7                                                   | SAM dependent carboxyl methyltransferase family protein              |
|                                 | LOC_Os01g10110 | 9.7                                                   | Cytokinin dehydrogenase 1 precursor, putative, expressed             |
|                                 | LOC_Os12g40890 | 6.3                                                   | Auxin-induced protein AUX28, putative, expressed                     |
| <b>Transcription factors</b>    | LOC_Os01g09640 | 5.7                                                   | Myb-like DNA-binding domain, SHAQKYF class family protein, expressed |
|                                 | LOC_Os12g38400 | 4.9                                                   | Myb-like DNA-binding domain containing protein, expressed            |
|                                 | LOC_Os03g10210 | 9.4                                                   | Homeobox domain containing protein, expressed                        |
|                                 | LOC_Os02g43330 | 7.9                                                   | Homeobox domain containing protein, expressed                        |
|                                 | LOC_Os03g51690 | 5.6                                                   | Homeobox protein OSH1, putative, expressed                           |
|                                 | LOC_Os03g22680 | 11.2                                                  | CHY zinc finger family protein, expressed                            |
|                                 | LOC_Os03g54170 | 0.2                                                   | MADS-box protein CMB1, putative, expressed                           |
|                                 | LOC_Os06g39960 | 0.2                                                   | bZIP transcription factor family protein, expressed                  |
|                                 | LOC_Os08g10080 | 4.7                                                   | NAC-domain containing protein 21/22, putative, expressed             |
|                                 | LOC_Os11g03300 | 5.1                                                   | NAC domain transcription factor, putative, expressed                 |
| LOC_Os08g42470                  | 7.7            | bHLH transcription factor GBOF-1, putative, expressed |                                                                      |
| <b>Oxidation stress related</b> | LOC_Os02g14430 | 8.2                                                   | Peroxidase 52 precursor, putative, expressed                         |
|                                 | LOC_Os04g59190 | 6.5                                                   | Peroxidase family protein, expressed                                 |
|                                 | LOC_Os04g59260 | 7.3                                                   | Peroxidase family protein, expressed                                 |
|                                 | LOC_Os06g35520 | 10                                                    | Peroxidase 52 precursor, putative, expressed                         |
|                                 | LOC_Os03g48780 | 0.1                                                   | Oxalate oxidase 2 precursor, putative, expressed                     |
|                                 | LOC_Os06g50930 | 8                                                     | Senescence-associated protein DIN1, putative, expressed              |
|                                 | LOC_Os02g02400 | 6.4                                                   | Catalase isozyme A, putative, expressed                              |
|                                 | LOC_Os03g28330 | 4.8                                                   | sucrose synthase, putative, expressed                                |
| LOC_Os08g36910                  | 6.6            | alpha-amylase precursor, putative, expressed          |                                                                      |

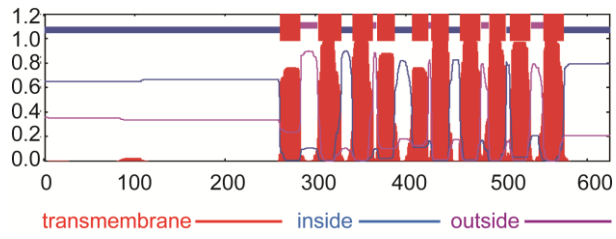

**Figure S1** 10 predicted transmembrane regions of SLAC7 protein.

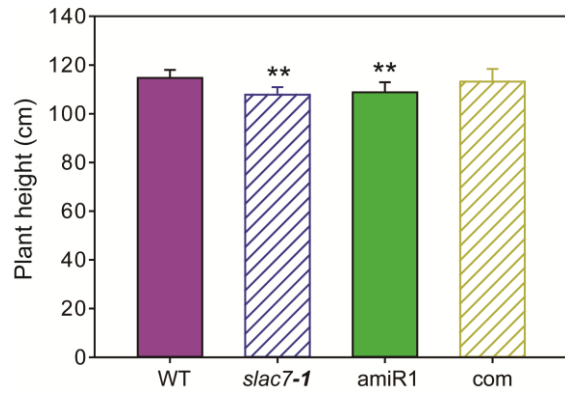

**Figure S2** Plant height of different transgenic plants (*slac7-1*, *amiR1* and *com*). Data represent mean values  $\pm$ SD of three independent experiments conducted with 60 different plants. Double asterisks denote a highly significant difference using Student's *t*-test ( $P < 0.01$ ).

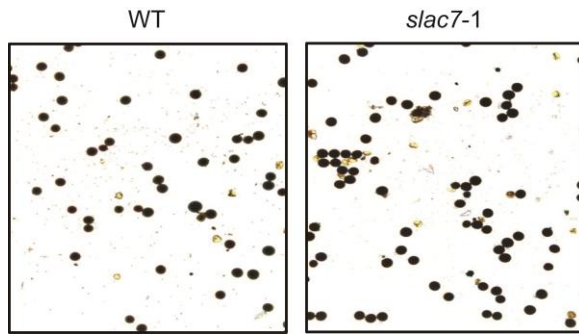

**Figure S3** Pollen starch staining shows normal *slac7-1* fertility.

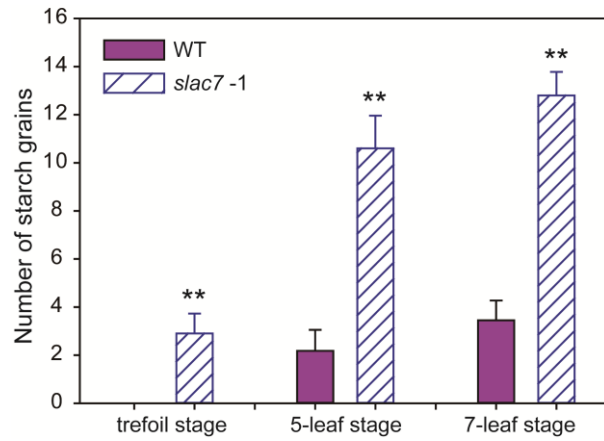

**Figure S4** Starch grain number of each chloroplast of *slac7-1* and wild-type leaves at different development stages. Data represent the mean values  $\pm$ SD of 15 independent experiments conducted with different samples. Double asterisks denote a highly significant difference between *slac7-1* and wild-type plants using Student's *t*-test ( $P < 0.01$ ).

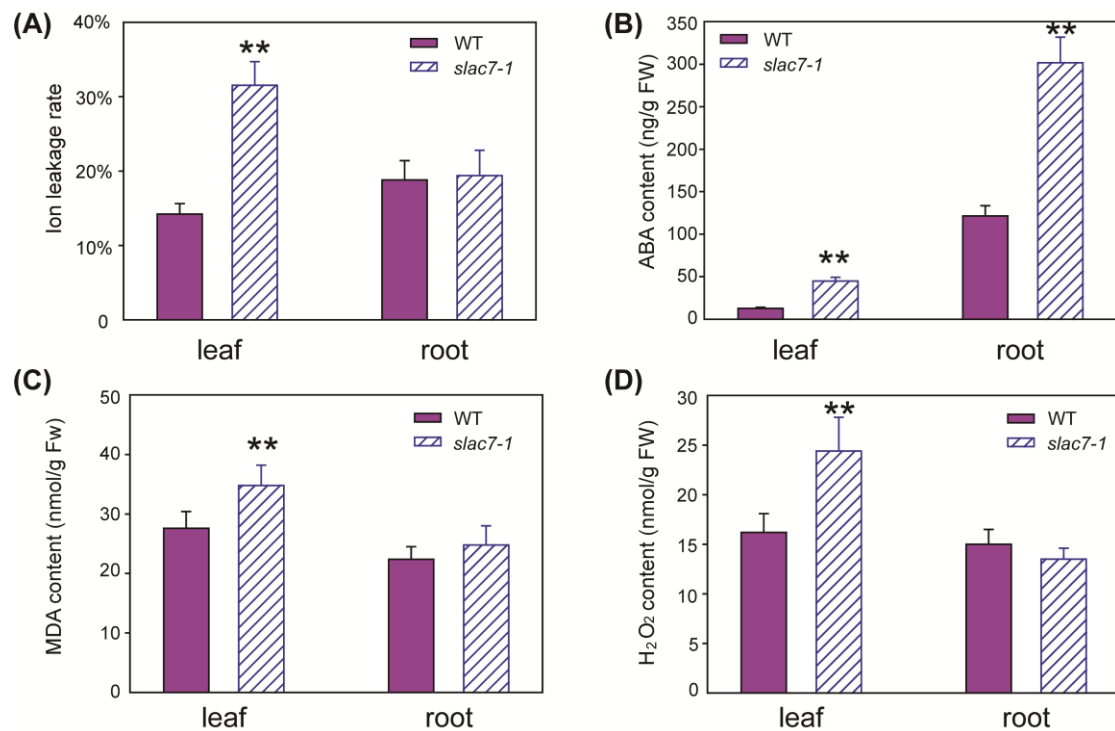

**Figure S5** *slac7-1* leaves were severely damaged.

(A) Ion leakage rate of *slac7-1* under normal growth condition. (B) ABA content in *slac7-1* leaves and roots. (C) MDA content in *slac7-1* leaves and roots. (D) H<sub>2</sub>O<sub>2</sub> content in *slac7-1* leaves and roots. Data represent the mean values  $\pm$ SD of three independent experiments conducted with different plants at 12-leaf stage. Double asterisks denote a highly significant difference between *slac7-1* and wild-type plants using Student's *t*-test ( $P < 0.01$ ).



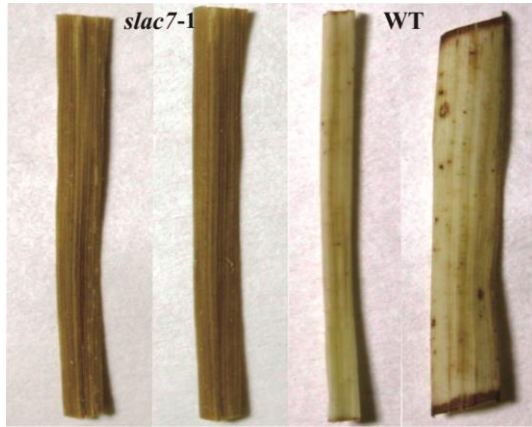

**Figure S6** Leaves of *slac7-1* and wild-type plants stained with DAB solution.

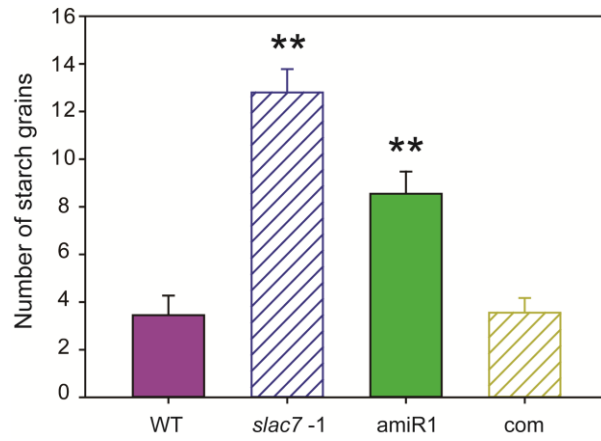

**Figure S7** Starch grain number of each chloroplast of different transgenic plants at 7-leaf stage. Data represent the mean values  $\pm$ SD of 15 independent experiments conducted with different samples. Double asterisks denote a highly significant difference using Student's *t*-test ( $P < 0.01$ ).

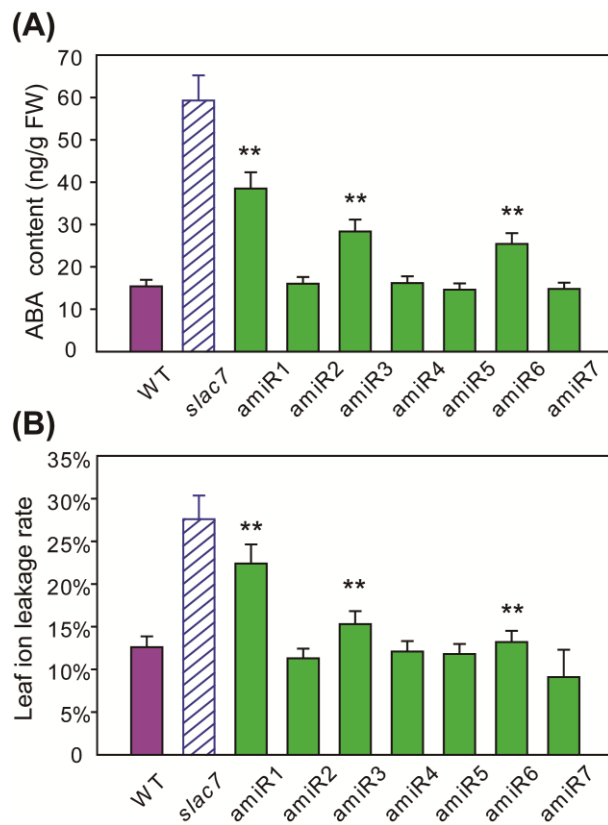

**Figure S8** Leaves of *SLAC7* amiRNA transgenic plants were severely damaged.

(A) ABA content in *SLAC7* amiRNA transgenic plants. (B) Leaf ion leakage rate in *SLAC7* amiRNA transgenic plants. Data represent the mean values  $\pm$ SD of three independent experiments conducted with different plants at 12-leaf stage. Double asterisks denote a highly significant difference between plants using Student's *t*-test ( $P < 0.01$ )

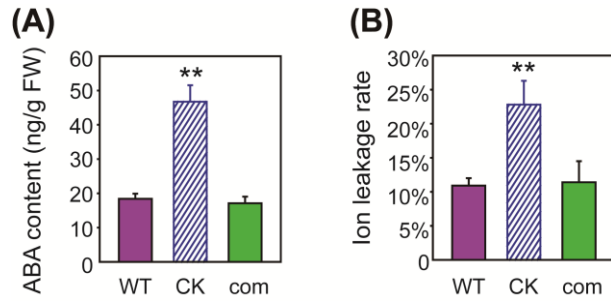

**Figure S9** Complementation of *slac7-1*.

(A) ABA content in pC2301+*SLAC7* (com) and *slac7-1* (CK) leaves. (B) Leaf ion leakage rate in pC2301+*SLAC7* (com) and *slac7-1* (CK) leaves. Data represent the mean values  $\pm$ SD of three independent experiments conducted with different plants at 12-leaf stage. Double asterisks denote a highly significant difference using Student's *t*-test ( $P < 0.01$ ).

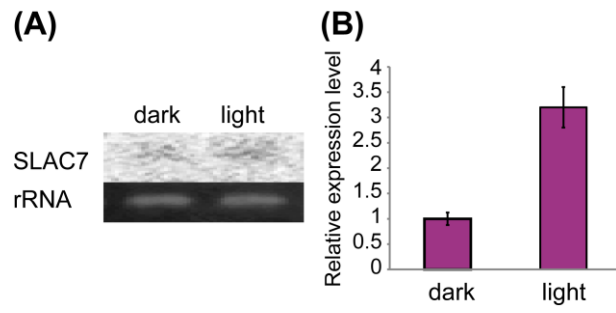

**Figure S10.** Expression level of *SLAC7* tested by (A) Northern blot and (B) RT-qPCR.

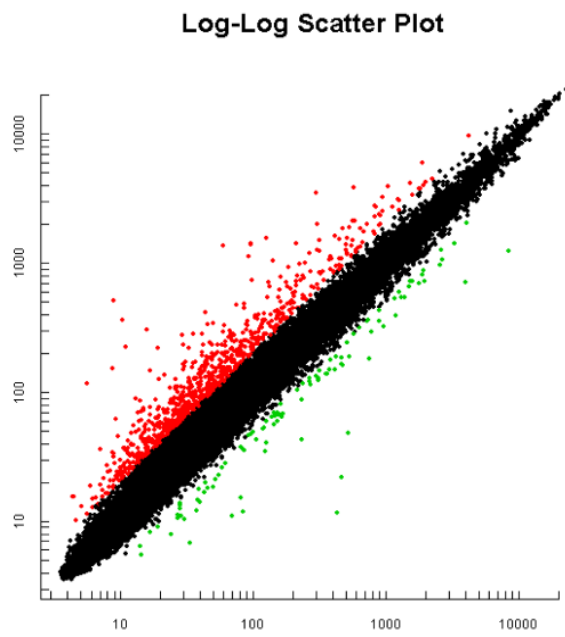

**Figure S11** Log-Log scatter plot of significant differentially expressed genes in *slac7-1* plants.

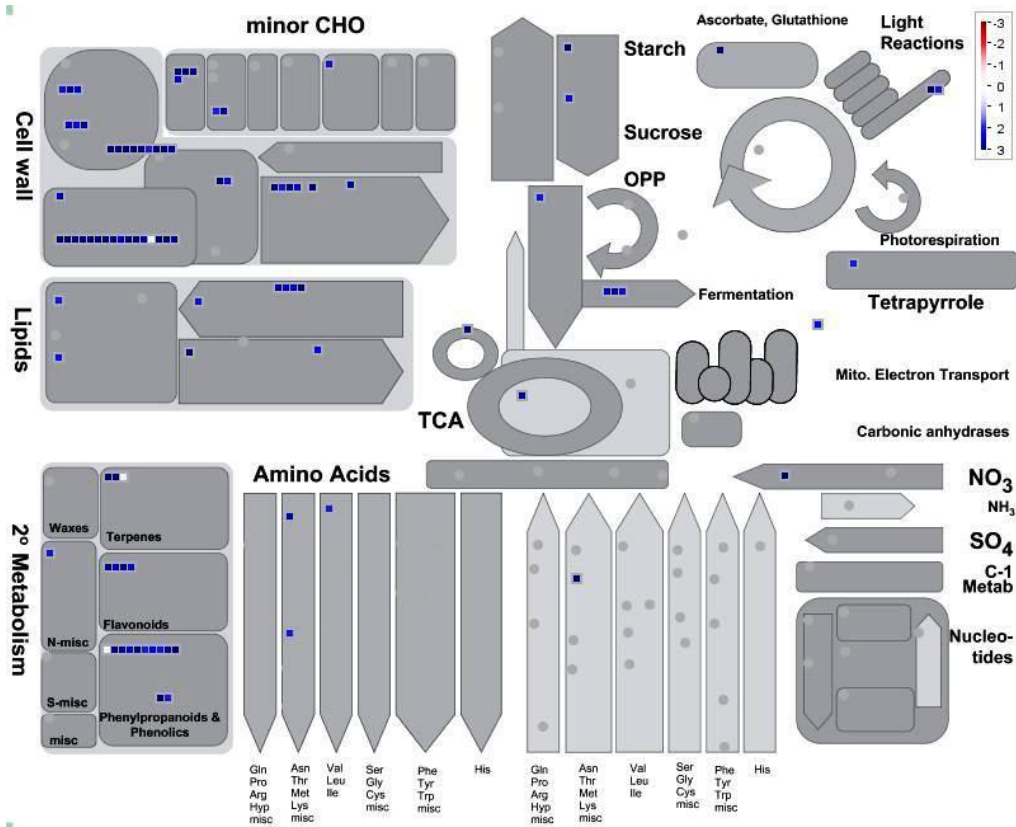

**Figure S12** Microarray analysis of the differential expression genes in whole metabolism using MapMan software (version 3.6.0RC1).

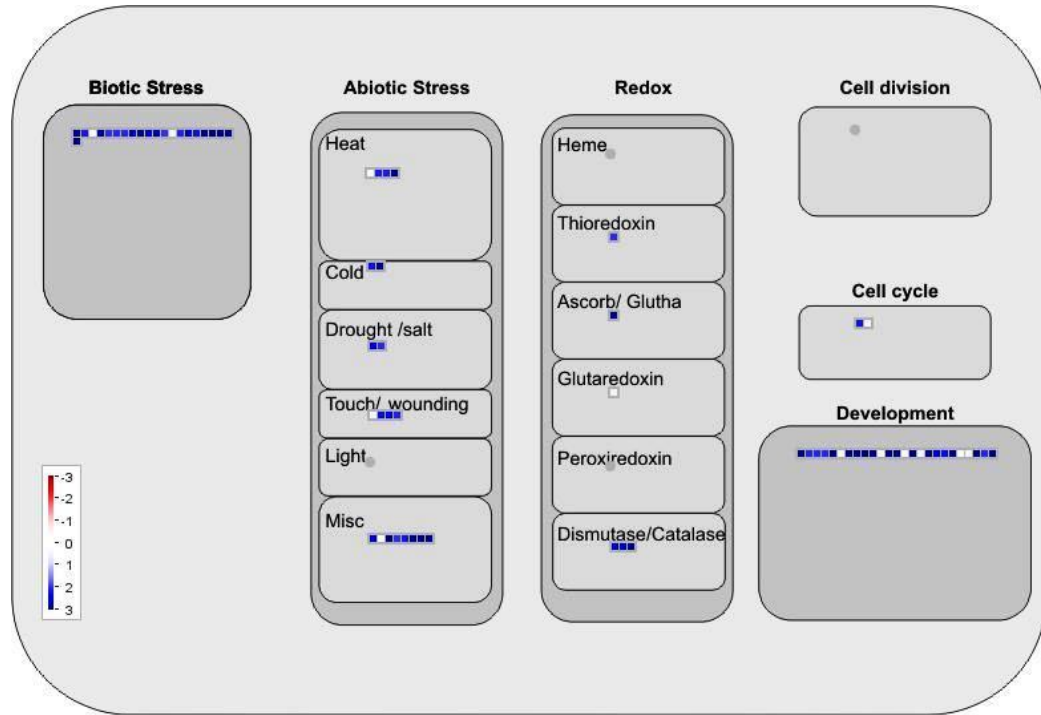

**Figure S13** Microarray analysis of the differential expression genes in cellular response using MapMan software (version 3.6.0RC1).



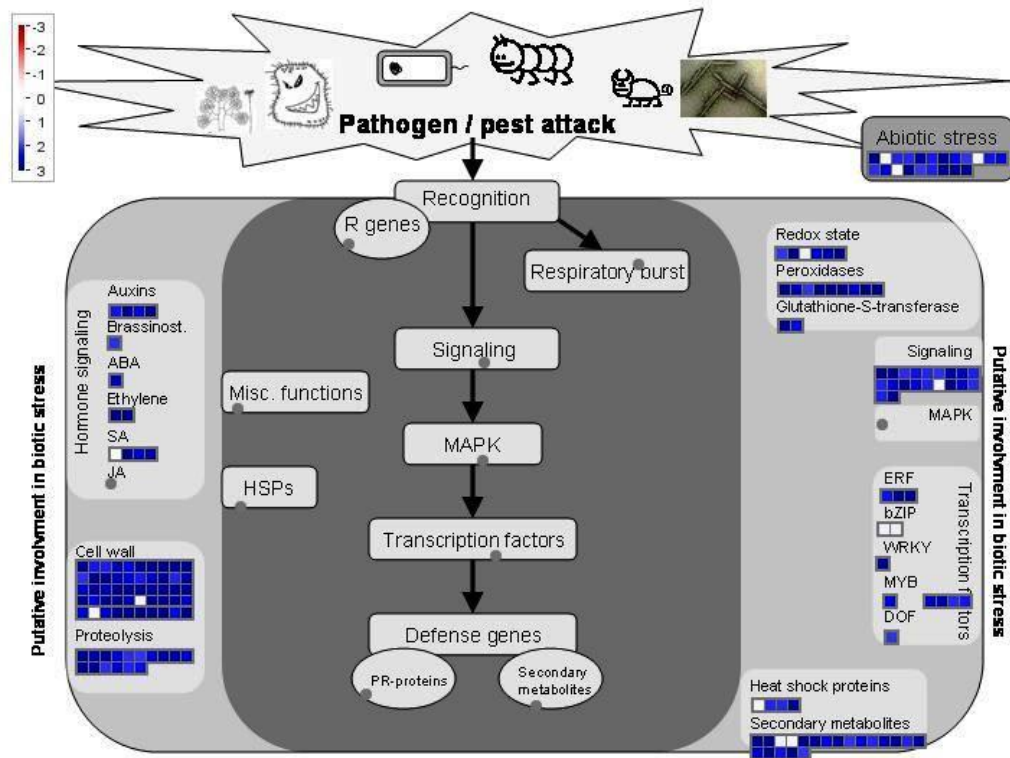

**Figure S14** Microarray analysis of the differential expression genes in stress response using MapMan software (version 3.6.0RC1).

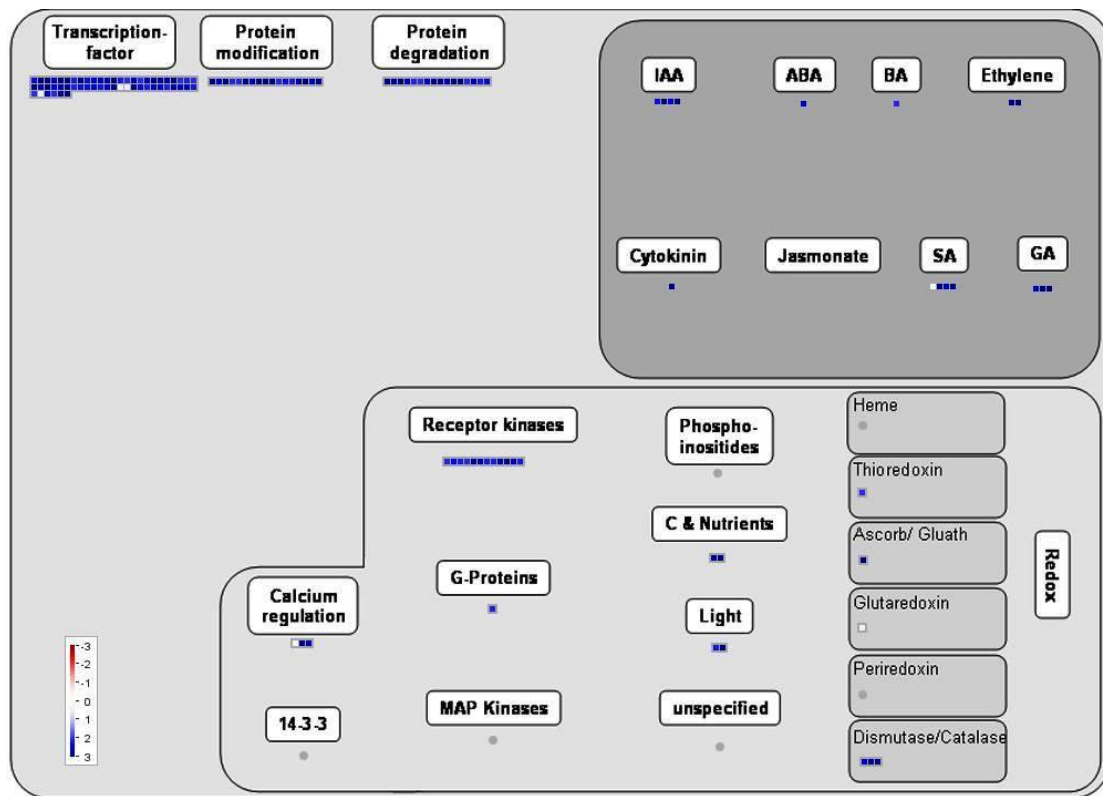

**Figure S15** Microarray analysis of the differential expression genes in regulation network using MapMan software (version 3.6.0RC1).

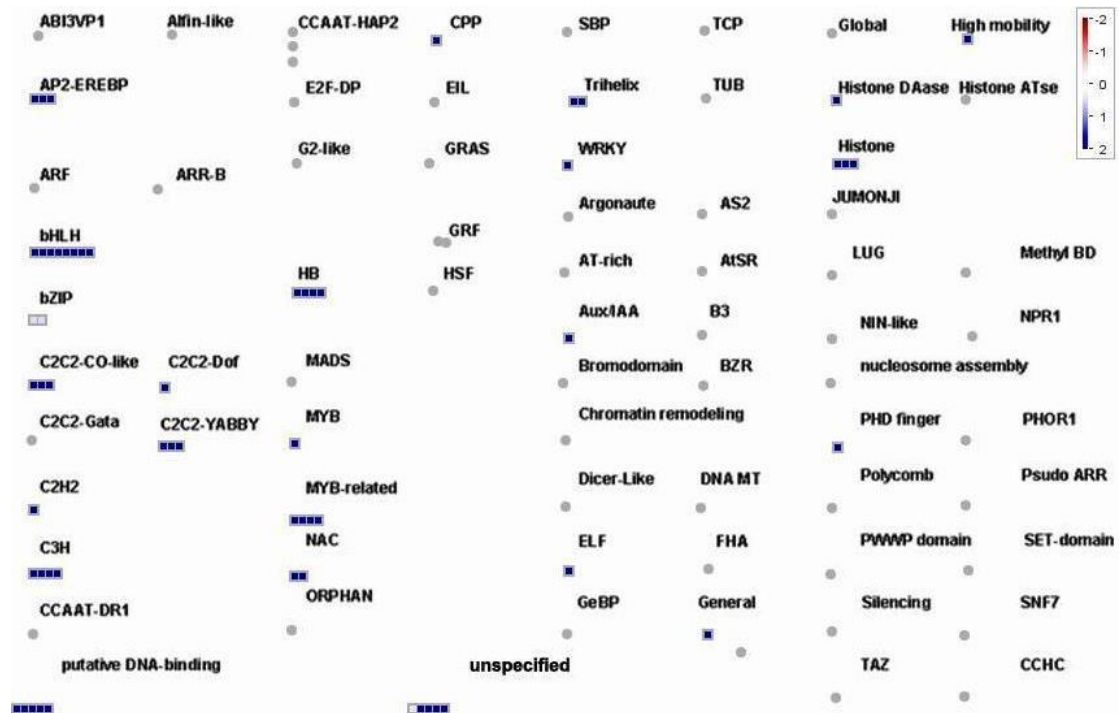

**Figure S16** Microarray analysis of the differential expression genes in transcription network using MapMan software (version 3.6.0RC1).

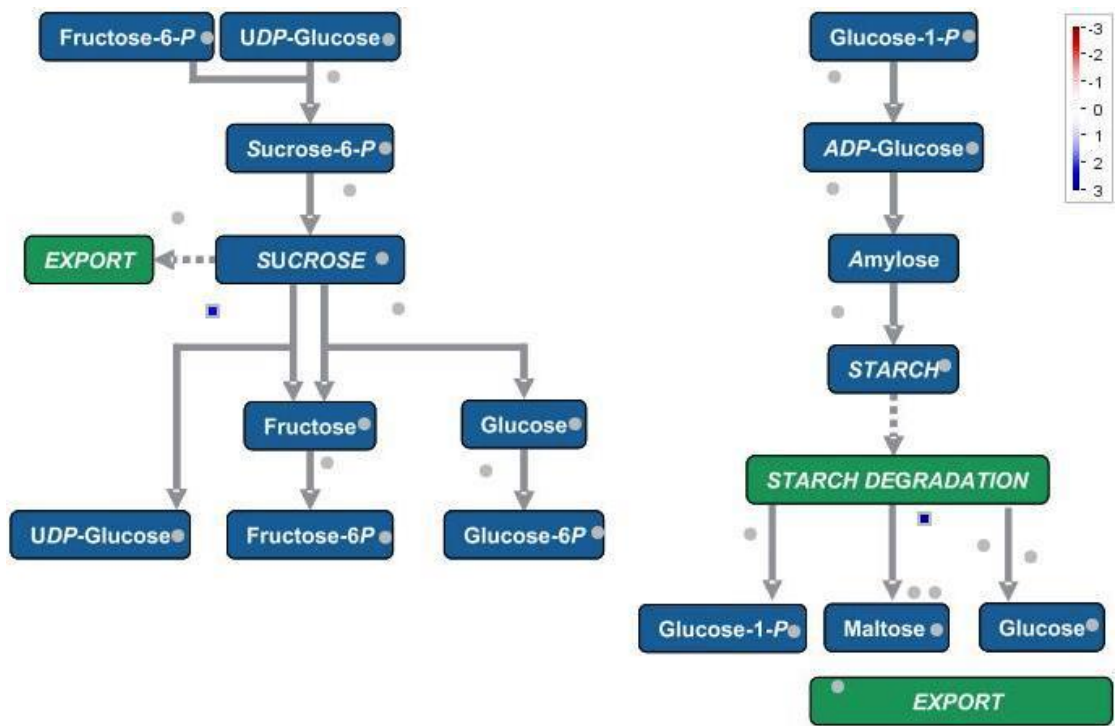

**Figure S17** Microarray analysis of the differential expression genes in the metabolism of sucrose and starch using MapMan software (version 3.6.0RC1).

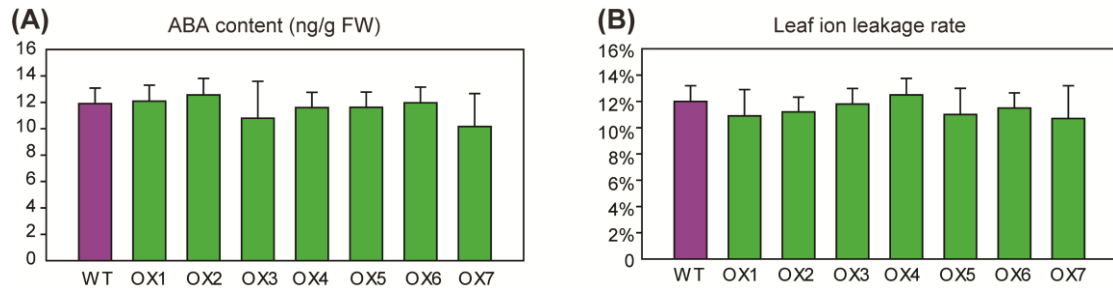

**Figure S18** ABA level and leaf ion leakage rate of *SLAC7* overexpression transgenic plants.

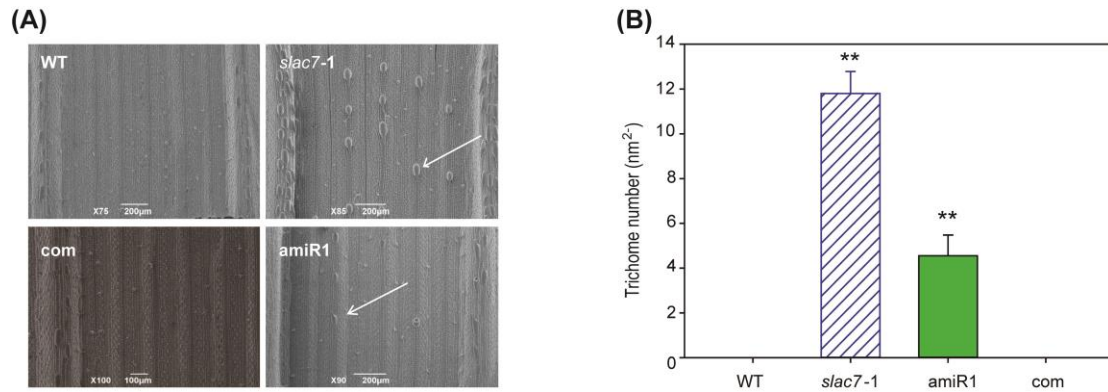

**Figure S19** The leaf trichome numbers of different transgenic plants. (A) Leaf trichomes of *slac7-1* and *amiR1* observed by scanning electron microscope. (B) The trichome numbers of *slac7-1* and *amiR1* leaves were significantly more than that of wild type. Data represent the mean values  $\pm$ SD of six independent experiments conducted with 7-leaf stage plants. Double asterisks denote a highly significant difference using Student's *t*-test ( $P < 0.01$ )

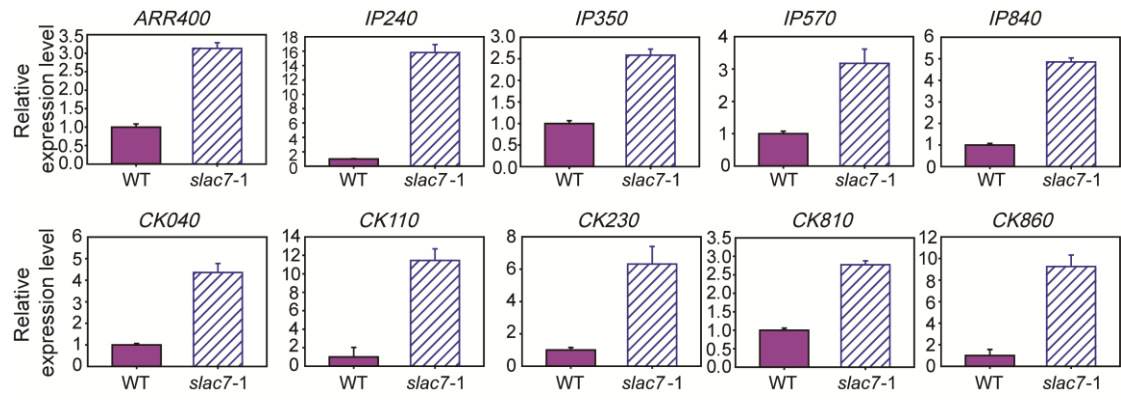

**Figure S20** Relative expression level of cytokinin metabolism related genes in *slac7-1* leaves.

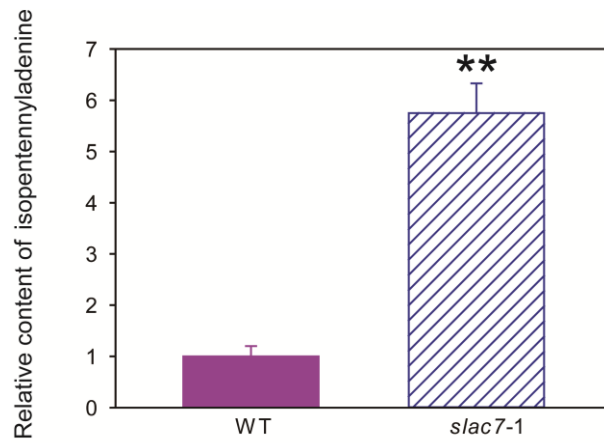

**Figure S21** Relative content of isopentenyladenine in *slac7-1* and wild-type leaves.

Data represent mean values  $\pm$ SD of three independent experiments conducted with different plants. Double asterisks denote a highly significant difference using Student's *t*-test ( $P < 0.01$ ).
